# Supplementary material for: Factors Affecting Sustainable Apparel Consumption in Emerging Countries: A Systematic Literature Review
Source: Preprints.org preprint supplement (doi:10.20944/preprints201908.0015.v1), 2019-08-02
Supplement: Supplementary file 1 [file supplementary]

## Sheet: wos
Investigating male consumers' lifestyle of health and sustainability (LOHAS) and perception toward slow fashion
Dichotomous Thinking and Ethical Consumerism: Overcoming the Negative Effects of Self-Interest Bias through Third-Person Narrative Persuasion
Controversial fashion, ethical concerns and environmentally significant behaviour The case of the leather industry
Sustainable fashion themes in luxury brand storytelling: The sustainability fashion research grid
Factors Affecting Sustainable Luxury Purchase Behavior: A Conceptual Framework
Comparing the relative importance of sustainability as a consumer purchase criterion of food and clothing in the retail sector
Factors motivating male consumers' eco-friendly apparel acquisition in the South African emerging market
Fashion brand green demarketing: Effects on customer attitudes and behavior intentions
The sustainability word challenge Exploring consumer interpretations of frequently used words to promote sustainable fashion brand behaviors and imagery
Second-hand clothing consumption: A generational cohort analysis of the Chinese market
Perceptions, attitudes, and behaviors toward sustainable fashion: Application of Q and Q-R methodologies
Staging luxury experiences for understanding sustainable fashion consumption: A balance theory application
Why do consumers choose sustainable fashion? A cross-cultural study of South Korean, Chinese, and Japanese consumers
Antecedents to organic cotton clothing purchase behaviour: study on Indian youth
Adoption of Eco-Friendly Faux Leather: Examining Consumer Attitude With the Value-Belief-Norm Framework
From quantity to quality: understanding slow fashion consumers for sustainability and consumer education
Predicting environmentally responsible apparel consumption behavior of future apparel industry professionals: The role of environmental apparel knowledge, environmentalism and materialism
Understanding fashion consumers' attitude and behavioral intention toward sustainable fashion products: Focus on sustainable knowledge sources and knowledge types
Understanding Chinese consumers’ intention to purchase sustainable fashion products: The moderating role of face-saving orientation.
Ts= ( ( sustainab* OR ethical OR slow OR eco OR "environment* friendly" OR secondhand OR swapping OR recycle* OR upcycle* ) AND ( fashion OR clothing OR apparel OR garment OR textile OR sportwear* OR outfit* OR costume OR attire ) AND ( behaviour OR "purchas* behaviour" OR "purchase intention" ) )

## Sheet: scopus
Authors	Title	Year
Hong H., Kang J.H.	The impact of moral philosophy and moral intensity on purchase behavior toward sustainable textile and apparel products	2019
Sung J., Woo H.	Investigating male consumers’ lifestyle of health and sustainability (LOHAS) and perception toward slow fashion	2019
Woodside A.G., Fine M.B.	Sustainable fashion themes in luxury brand storytelling: The sustainability fashion research grid [奢侈品品牌故事中的可持续时尚主题: 可持续时尚研究网格]	2019
Jain S.	Factors Affecting Sustainable Luxury Purchase Behavior: A Conceptual Framework	2019
Liang J., Xu Y.	Second-hand clothing consumption: A generational cohort analysis of the Chinese market	2018
Evans S., Peirson-Smith A.	The sustainability word challenge: Exploring consumer interpretations of frequently used words to promote sustainable fashion brand behaviors and imagery	2018
Min Kong H., Ko E.	Why do consumers choose sustainable fashion? A cross-cultural study of South Korean, Chinese, and Japanese consumers	2017
Han J., Seo Y., Ko E.	Staging luxury experiences for understanding sustainable fashion consumption: A balance theory application	2017
Song S., Ko E.	Perceptions, attitudes, and behaviors toward sustainable fashion: Application of Q and Q-R methodologies	2017
Khare A., Varshneya G.	Antecedents to organic cotton clothing purchase behaviour: study on Indian youth	2017
Ha S., Kwon S.Y.	Spillover from past recycling to green apparel shopping behavior: the role of environmental concern and anticipated guilt	2016
Sadachar A., Feng F., Karpova E.E., Manchiraju S.	Predicting environmentally responsible apparel consumption behavior of future apparel industry professionals: The role of environmental apparel knowledge, environmentalism and materialism	2016
Lee M.-Y., Sung J.	Sustainability and management in fashion, design and culture	2016
Kong H.M., Ko E., Chae H., Mattila P.	Understanding fashion consumers’ attitude and behavioral intention toward sustainable fashion products: Focus on sustainable knowledge sources and knowledge types	2016
Lee J., Lee Y.	The interactions of CSR, self-congruity and purchase intention among Chinese consumers	2015
	TITLE-ABS-KEY ( ( sustainab* OR ethical OR slow OR eco OR "environment* friendly" OR secondhand OR swapping OR recycle* OR upcycle* ) AND ( fashion OR clothing OR apparel OR garment OR textile OR sportwear* OR outfit* OR costume OR attire ) AND ( behaviour OR "purchas* behaviour" OR "purchase intention" ) ) AND ( LIMIT-TO ( PUBSTAGE , "final" ) ) AND ( LIMIT-TO ( AFFILCOUNTRY , "China" ) OR LIMIT…

## Sheet: google scholar
Predictors of purchase intention toward green apparel products: A cross-cultural investigation in the USA and China.	Ko (2017)	Journal of Fashion Marketing and Management Q2	1.to understand consumers’ purchase intention toward green apparel products using the theory of planned behavior (TPB). 2.study aimed to compare U.S. and Chinese consumers to understand how green apparel behaviors differ by a country’s green market status and cultural differences.	limited studies regarding consumers green behavior in apparel products have been conducted and some focused only on green issues in the production stage without looking at consumer buying habits.	TPB value-orientation to describe cultural values	conceptual model integrating the TPB with two antecedents, man-nature orientation and environmental knowled	Paper and pencil survey	China USA	Man-nature orientation Environmental knowledge	Purchase Intention toward Green Apparel Products	Mediators: Attitude toward purchasing green apparel products Subjective norm PBC (Internal/external)	Female college student China: 194q USA: 234 q	H1:Man-nature orientation → Attitude (SUPPORTED) H2:Environmental knowledge → Attitude (SUPPORTED) H3:Environmental knowledge → Internal PBC (SUPPORTED) H4:Attitude → Purchase Intention (SUPPORTED) H5:Subjective norm → Purchase Intention (SUPPORTED) H6:Internal PBC → Purchase Intention(SUPPORTED) H7:External PBC → Purchase Intention (REJECTED)	In addition, there were study restrictions regarding survey participants (i.e., college students) and survey locations, which may limit the generalization of the findings. Future studies could conduct the data collection in different areas with different demographic groups in order to find more general and accurate results.	This is one of the earliest endeavors to include man-nature orientation and environmental knowledge as antecedents of attitude and internal PBC toward green apparel products in a comprehensive model of purchase intention of green apparel products.
Impact of social influence and green consumption values on purchase intention of organic clothing: a study on collectivist developing economy	Varshneya(2017)	Global business reviewQ3	1.the study will investigate the impact of social influence and green consumption values on the purchase intention for organic clothing. 2.the study will also examine the role of attitude as a partial mediator in the relationship between green consumption values and purchase intention	This study is intended to examine the behaviour of consumers in emerging economies for niche products like organic clothing which is relatively lesser explored when compared to other organic product categories.	TPB and consumption value theory		Quantitative analysis, AMOS 19	India	Social influence Attitude Green consumption values	Purchase Intention for organic clothing		215, returned 160	The outcomes also highlight that for products at the introductory stages of lifecycle, such as organic clothing, social influence does not play a vital role even in a collectivist culture. In such situations, consumers in a collectivist culture like India tend to exhibit individualistic behaviour. This study provides a unique and useful insight regarding behaviour of consumers in emerging economi…	1. Several other factors such as resistance to change, impulse buying, income and price perception of organic clothing need to be studied. 2.future studies can also evaluate the moderating role of income, gender, fashion consciousness, etc. This can bring useful insights in the concerned field.	marketers should always try to influence individualistic attitude by different promotional campaigns. The marketers need to put in considerable amount of efforts in changing consumers’ mindset that although organic clothing is costlier, the cost is worth because it has immense benefits for the environment and human beings.
Factors motivating male consumers' eco‐friendly apparel acquisition in the South African emerging market	Taljaard(2018)	International Journal of Consumer Studies Q3	This study focuses on male consumers’ underlying motivation and intent to acquire apparel in an eco‐friendly manner.	This attitude-behaviour gap has been the topic of much debate in environmental consumerism, with various contributing factors identified as the underlying basis of such inconsistency (Ha-Brookshire & Norum, 2011). Some of the influencing factors identified by previous research included the absence of environmental awareness (Momberg et al., 2012), inconvenience (Kozar & Hiller Connell, 2013), lim…	NAT & TPB		non‐probability, purposive sampling. Respondents completed online(survey monkey) and paper‐based questionnaires	South Africa	Awareness of the environmental consequences (related to apparel consumption) Social norms Moral norm Attitudes Perceived behavioural control Self-efficacy Controllability (as a dimension of perceived behavioural control)	consumers’ pro-environmental intent to engage in eco-friendly apparel acquisition.		305 male	Results suggest that respondents are aware of the environmental consequences of their apparel behaviour, which then ultimately influences their behavioural intent. In contrast to studies conducted abroad, social and moral norms did not significantly influence their decisions to acquire apparel in a pro‐environmental manner. Respondents’ attitudes and self‐efficacy (i.e. a dimension of perceived b…	future research could include the actual behaviour as well to determine the pro-environmental apparel acquisition behaviour of South African consumers and determine to what extent the motivational factors influence the intent and the eventual behaviour
Antecedents to organic cotton clothing purchase behaviour: study on Indian youth	Khare (2017)	Journal of Fashion Marketing and ManagementQ2	to examine influence of past environment-friendly behaviour, peer influence and green apparel knowledge in the context of organic clothing purchase behaviour.	Considering these changing trends, it was felt that understanding Indian youth’s preference for organic clothing would help apparel manufacturers in marketing organic apparel brands. Youths are more fashion conscious than other consumer segments and likely to pursue global lifestyles.	TPB		all students were randomly contacted via telephone and requested to participate in the survey.	India	Past green peer influence green apparel knowledge	Green apparel purchase behaviour		889 students who had past experience with green products.	The findings suggest that decision to purchase organic clothing amongst youngsters was mainly related to one’s pro-environmental values, past-experience and awareness of green brands.	The influence of demographic variables like age, gender, income, and occupation on organic clothing purchase behaviour was not examined	past environmentally friendly behaviour influenced Indian youth’s organic clothing purchase behaviour. Interestingly, green apparel knowledge and peer influence had no impact on organic clothing purchase behaviour.
Determinants of Organic Cotton Apparel Purchase: A Comparison of Young Consumers in the U.S.A. and South Korea	Han(2018)	Sustainability Q2	This study examined consumers from distinct cultural groups to explore similarities and differences in their green purchase behaviors. A	Majority of the TPB studies in this domain are focused on Western consumers and there is a lack of studies comparing consumer behaviors in different cultural settings, thus making it difficult to generalize study results to a broader group of consumer segments.	TPB		online surveys	USA,Korea	Attitude PBC Injunctive norms descriptive norms	Purchase Intention	Moderator: IN,DN	334 participants (164 for the U.S.A. sample and 170 for South Korea sample)	Both similarities and differences were found in the two cultural groups. In terms of similarities, PBC and descriptive norms were strong predictors of consumers’ intentions to purchase and injunctive norms were a strong predictor of attitude in both countries. However, the major difference was that South Koreans were more affected by the social pressure: their purchase intentions were strongly in…	1.This study focused on young consumers of the U.S.A. and South Korea, which may have controlled the potential problem of inequality in age groups between the two samples. 2.For future studies, it would be interesting to recruit samples of which demographic characteristics such as age, income, and education level can be representative of the population.	Marketers of organic cotton apparel may consider using diverse formats of media to display consumers’ ethical buying behaviors or creating product design or packaging that can directly reveal the ethical features of the product to display greater exposure in the market.
Motivating sustainable consumption among Chinese adolescents: An empirical examination	Geng(2017)	Journal of cleaner production Q1	To explore the role of SC understanding for motivating SC behaviors	1.Sustainable consumption (SC) considers purchase, use, and treatment of products. 2.Chinese adolescents know litter about SC, which demotivates SC behaviors. 3.Education is necessary to understand SC and then purchase sustainable products	TPB	Extended TPB model	Questionnaire survey	China	Influencing factors -Education -Sustainable awareness and attitude -Social influence -Effectiveness of energy saving and emissions reduction for sustainable products -Differentiation of sustainable products from regular products	Behaviors -Purchasing -Use -treatment & disposal	Mediator: Understanding Moderator: age	623 usable questionnaires collected from junior high schools and senior high schools in in three eastern cities of China.	SC understanding is necessary to motivate SC behaviors with certain influencing factors. Chinese adolescents can understand the SC concept through education and then purchase sustainable products. Only if sustainable products can show benefits of energy saving and emission reduction, Chinese adolescent would like to use these products. Environmental awareness and attitude can bring environmental …	how to effectively educate Chinese adolescents is still unclear. Moreover, how to effectively disseminate the SC concept and understanding is needed attention	Besides sustainable production, SC can not only benefit for the environment, but also really motivate enterprises to produce sustainable products. Thus, SC has become extremely important for stainable development. Due to the low environmental awareness and the limited understanding of the SC concept, Chinese consumers may be reluctant for SC practices. Adolescents are generally more inclined to S…
Understanding environmentally friendly apparel consumption: an empirical study of Chinese consumers	Chi2016	Int. J. Sustainable Society	This study aims to empirically determine the factors that significantly affect Chinese consumers’ EFA purchase intention.	Despite the great potential of this market and the recent enthusiasm shown by more marketers, our knowledge about Chinese consumers in this emergent phenomenon is very limited (Diette et al., 2012).	TRA & TPB		complete the questionnaire during the class time.	China				250 chinese college students from different majors	The model exhibited high explanatory power. Attitude, subjective norm, PBC, and PCE showed significantly positive effects on EFA purchase intention, while PBC and EFA knowledge enhance the relationship between attitude and EFA purchase intention. In addition, consumers who care more about in-group belonging were more willing to conform to subjective norms and felt higher consumer effectiveness in…	estimation techniques for interaction latent constructs are appropriate and valid, using a single indicator for a multi-item construct could lose certain information about the construct. In the future, other methods such as multi-group analysis may be applied for testing moderating effects of the investigated constructs	Marketers and companies should develop marketing strategies and programs that can cultivate and promote favourable attitudes among target consumers toward EFA consumption because EFA purchase attitude significantly affects consumers’ EFA purchase intention. Since the consumers’ EFA purchase attitudes are strongly influenced by their long-term orientation, in advertisements, companies may emphasis…
Comparing the relative importance of sustainability as a consumer purchase criterion of food and clothing in the retail sector	Nilssen 2018	Journal of Brand Management Q3	Determine the relative importance of sustainability as a purchase criterion in South African retailing for food and clothing.	Indian youth buying organic clothing can create a comprehensive and large positive impact on the environment given the fact that India is collectivistic society with 1.3 billion population.Therefore, the overarching goal of the present study was to gain more insights, which were not captured previously, and help to close the future possibility gap in clothing industry. Drawing from earlier studie…	TPB		Quantitative analysis.5,000 students were randomly contacted through telephone and requested to participate in the survey.	India	Past green behaviour Green peer influence	Green apparel buying behaviour	Moderator : CSSI Mediator: Green apparel knowledge	981 respondents	H1a,b: Green peer influence (rejected) H2a,b,c: CSII (supported) H3:Past green behavior (supported) H4: Past green behavior (not supported) H5: Green apparel knowledge (rejected)	1.Green apparel attributes such as price, style, design, and brands could potentially be considered in future studies. 2.The relationship between fashion consciousness, variety seeking behaviour, and innovativeness with green apparel purchase could also be examined.	Several studies have discussed the relationship of green brands, trust and green buying. However, in emerging countries such as India, this is an upcoming area of research. The current study examined only a limited set of variables to understand green apparel buying behaviour.
Sustainability and philanthropic awareness in clothing disposal behavior among young Malaysian consumers	Yee(2016)	SAGE Journal	need to understand how young fashionable consumers are disposing their unwanted clothes.				Quantitative analysis, AMOS 18.0	Malaysia	Environmental economic factor Philatrophic awareness factor	Clothing disposal behaviour	Mediator: Attitude toward clothing disposal	205 young respondents rate 25%	the results show that clothing disposal behavior is affected by philanthropic awareness and mediated by the attitude toward clothing disposal. Interestingly, environmental economic factors only influence clothing disposal behavior through the attitude toward the disposal of clothing.

## Sheet: duplication
WOS	SCOPUS	GS
Investigating male consumers' lifestyle of health and sustainability (LOHAS) and perception toward slow fashion	The impact of moral philosophy and moral intensity on purchase behavior toward sustainable textile and apparel products	Predictors of purchase intention toward green apparel products: A cross-cultural investigation in the USA and China.
Controversial fashion, ethical concerns and environmentally significant behaviour The case of the leather industry	Spillover from past recycling to green apparel shopping behavior: the role of environmental concern and anticipated guilt	Impact of social influence and green consumption values on purchase intention of organic clothing: a study on collectivist developing economy
	Sustainability and management in fashion, design and culture	Determinants of Organic Cotton Apparel Purchase: A Comparison of Young Consumers in the U.S.A. and South Korea
+A5:A10Factors Affecting Sustainable Luxury Purchase Behavior: A Conceptual Framework	The interactions of CSR, self-congruity and purchase intention among Chinese consumers	Understanding environmentally friendly apparel consumption: an empirical study of Chinese consumers
Comparing the relative importance of sustainability as a consumer purchase criterion of food and clothing in the retail sector		Sustainability and philanthropic awareness in clothing disposal behavior among young Malaysian consumers
Factors motivating male consumers' eco-friendly apparel acquisition in the South African emerging market
Fashion brand green demarketing: Effects on customer attitudes and behavior intentions
The sustainability word challenge Exploring consumer interpretations of frequently used words to promote sustainable fashion brand behaviors and imagery
Second-hand clothing consumption: A generational cohort analysis of the Chinese market
Perceptions, attitudes, and behaviors toward sustainable fashion: Application of Q and Q-R methodologies
Staging luxury experiences for understanding sustainable fashion consumption: A balance theory application
Why do consumers choose sustainable fashion? A cross-cultural study of South Korean, Chinese, and Japanese consumers
Antecedents to organic cotton clothing purchase behaviour: study on Indian youth
Adoption of Eco-Friendly Faux Leather: Examining Consumer Attitude With the Value-Belief-Norm Framework
From quantity to quality: understanding slow fashion consumers for sustainability and consumer education
Predicting environmentally responsible apparel consumption behavior of future apparel industry professionals: The role of environmental apparel knowledge, environmentalism and materialism
Understanding fashion consumers' attitude and behavioral intention toward sustainable fashion products: Focus on sustainable knowledge sources and knowledge types
Understanding Chinese consumers’ intention to purchase sustainable fashion products: The moderating role of face-saving orientation.

## Sheet: wos c
Title	Countries	Method	Authors/years	value	belief	attitude	sn	pbc	environmental concern	pi	behaviour	Willingness to pay more	knowledge	Finding
Controversial fashion, ethical concerns and environmentally significant behaviour The case of the leather industry	South Africa	QN	de Klerk et al. (2018)	/						/	/			Functional and individual value perceptions were the most important, indicating that these consumers focus on the functional benefits that are obtained from the product that they purchase, which include aspects such as quality and durability. This correlates with the research of Steinhart et al. (2013), who noted that ethical luxury consumption is only possible if the ethical luxury product is po…
Comparing the relative importance of sustainability as a consumer purchase criterion of food and clothing in the retail sector	South Africa	QL	Nilssen et al. (2018)	/		/								For clothing, the criteria weighted as most important during the purchase decision was fit of the product, followed by price and thirdly quality. Closing the attitude behaviour gap in foods is relatively easier than in clothing due to the personal nature of the consumption. Additionally, the role of clothing in a modern society is loaded and complex as various other factors are at play that affec…
Factors motivating male consumers' eco-friendly apparel acquisition in the South African emerging market	South Africa	QN	Taljaard et al. (2018)			/	/	/	/	/				Results suggest that respondents are aware of the environmental consequences that are linked to the apparel industry and consumers’ apparel behaviour, which then ultimately influences their behavioural intent. However, in contrast to studies conducted abroad, social and moral norms did not significantly influence their decisions to acquire apparel in a pro-environmental manner. Respondents’ attit…
Fashion brand green demarketing: Effects on customer attitudes and behavior intentions	South Korea	QN	Kim et al. (2018)			/				/				The study shows that green demarketing advertising positively affects consumer attitudes and behavior intentions in consumers who have either analytic or intuitive cognitive styles. All cognitive styles react most positively to concrete rather than abstract demarketing advertisements.
The sustainability word challenge Exploring consumer interpretations of frequently used words to promote sustainable fashion brand behaviors and imagery	Hong Kong, China	QN	Evans and Smith (2018)								/		/	A lack of understanding and comprehension of key green language terminology used frequently in user facing communications is problematic for fashion brand marketers as the impact of their messages is often unclear, distributed and more likely to lead to user frustration rather than positive engaged consumer decision making and action. Further, there is an emerging indication that this approach is…
Second-hand clothing consumption: A generational cohort analysis of the Chinese market	China	QN	Liang and Xu 2017	/			/		/					The younger generations perceived higher values and held higher purchase intentions than their older counterparts. Different motivations were also identified among the four cohorts (Post-60s, Post-70s, Post-80s and Post-90s) in their second-hand clothing consumption.
Perceptions, attitudes, and behaviors toward sustainable fashion: Application of Q and Q-R methodologies	South korea	MM	Song et al 2017			/				/	/			Results showed that sustainable fashion consumers in South Korea are most often opinion leaders who are interested in both fashion shopping and sustainability.
Staging luxury experiences for understanding sustainable fashion consumption: A balance theory application	South korea	QL	Han et al. (2017)	/			/					/	/	This study demonstrates that fashion consumers' limited awareness and knowledge about sustainable fashion products may promote negative sentiments toward SFPC. However, the findings demonstrate that fashion marketers can overcome negative sentiments by staging personalized experiences. Specifically, the staged experiences enable fashion consumers to acquire practical knowledge about sustainable f…
Why do consumers choose sustainable fashion? A cross-cultural study of South Korean, Chinese, and Japanese consumers	South korea, China, Japan	QN	Kong & Eunju Ko 2017	/					/	/			/	Consumers of sustainable products indeed have strong environmental concerns, product knowledge, and positive perceived benefits. However, some hesitate to purchase SFP because they are skeptical about its quality and esthetic value. Those who are loyal to sustainable products tend to focus on health, eco-friendliness, and economic benefits. If they see that sustainable purchasing behavior threate…
Antecedents to organic cotton clothing purchase behaviour: study on Indian youth	India	QN	Varshneya , (2017)				/		/		/			green apparel knowledge and peer influence had no impact on organic clothing purchase behaviour. Youths purchasing organic clothing should be differentiated from other groups so that they can be used as opinion leaders to promote environmentally friendly attitudes. Organic clothing can be positioned as a premium product line that focuses on environmentally friendly attributes.
Understanding fashion consumers' attitude and behavioral intention toward sustainable fashion products: Focus on sustainable knowledge sources and knowledge types	South Korea	QN	Kong et al (2016)			/	/			/			/	sustainability knowledge types and attitudes toward sustainable fashion products results shows that effectiveness and social knowledge have positive effects on attitudes toward sustainable fashion products.
Understanding Chinese consumers’ intention to purchase sustainable fashion products: The moderating role of face-saving orientation.	China	QN	Wei, X., & Jung, S. (2017)				/				/			Chinese consumers tend to believe it is the government that is responsible for environmental issues , so green value might be regarded as less relevant to Chinese consumers. With the importance of product value, we also found that Chinese consumers’ behavioral intention towards purchasing sustainable fashion products was closely related to face-saving values.

## Sheet: gs c
Tittle	Methods	Countries	years	value	attitude	sn	pbc	environmental concern	pi	behaviour	Willingness to pay more	knowledge	Findings
Predictors of purchase intention toward green apparel products: A cross-cultural investigation in the USA and China.	QN	USA/CHINA	Seung Bong Ko Byoungho Jin , (2017)		/	/	/		/			/	These findings are quite surprising because subjective norm influence purchase intention the most in both countries (USA/CHINA)
Impact of social influence and green consumption values on purchase intention of organic clothing: a study on collectivist developing economy	QN	India	Varshneya et al. (2017)	/	/	/			/				social influence and attitudes does not impact purchase intention as well as attitude towards organic clothing.
Determinants of Organic Cotton Apparel Purchase: A Comparison of Young Consumers in the U.S.A. and South Korea	QN	USA/SOUTH KOREA	Han (2018)			/	/		/				attitude was the strongest predictor of American consumers’ purchase intentions, it had an insignificant effect on Korean consumers’ purchase intentions.
Understanding environmentally friendly apparel consumption: an empirical study of Chinese consumers	QN	China	Chi and Zheng (2016)		/	/	/		/			/	Chinese consumers attempt to conform to group norms and therefore tend to consume the products that other members of the group recommend.
Sustainability and philanthropic awareness in clothing disposal behavior among young Malaysian consumers	QN	Malaysia	Yee et al. (2016)		/					/		/	charity factors have a strong positive relationship to attitude toward clothing disposal and clothing disposal behavior; whereas, the environmental economic factor directly influences the attitude toward clothing disposal but does not directly affect the clothing disposal behavior.

## Sheet: COMBINE
Title	Countries	Method	Authors/years	value	belief	attitude	sn	pbc	environmental concern	pi	behaviour	Willingness to pay more	knowledge	Finding	JOURNAL
Controversial fashion, ethical concerns and environmentally significant behaviour The case of the leather industry	South Africa	QN	de Klerk et al. (2018)	/						/	/			Functional and individual value perceptions were the most important, indicating that these consumers focus on the functional benefits that are obtained from the product that they purchase, which include aspects such as quality and durability. This correlates with the research of Steinhart et al. (2013), who noted that ethical luxury consumption is only possible if the ethical luxury product is po…	International Journal of Retail and Distribution Management
Comparing the relative importance of sustainability as a consumer purchase criterion of food and clothing in the retail sector	South Africa	QL	Nilssen et al. (2018)	/		/								For clothing, the criteria weighted as most important during the purchase decision was fit of the product, followed by price and thirdly quality. Closing the attitude behaviour gap in foods is relatively easier than in clothing due to the personal nature of the consumption. Additionally, the role of clothing in a modern society is loaded and complex as various other factors are at play that affec…	Journal Brand Management
Factors motivating male consumers' eco-friendly apparel acquisition in the South African emerging market	South Africa	QN	Taljaard et al. (2018)			/	/	/	/	/				Results suggest that respondents are aware of the environmental consequences that are linked to the apparel industry and consumers’ apparel behaviour, which then ultimately influences their behavioural intent. However, in contrast to studies conducted abroad, social and moral norms did not significantly influence their decisions to acquire apparel in a pro-environmental manner. Respondents’ attit…	International journal of consumer studies
The sustainability word challenge Exploring consumer interpretations of frequently used words to promote sustainable fashion brand behaviors and imagery	Hong Kong, China	QN	Evans and Smith (2018)								/		/	A lack of understanding and comprehension of key green language terminology used frequently in user facing communications is problematic for fashion brand marketers as the impact of their messages is often unclear, distributed and more likely to lead to user frustration rather than positive engaged consumer decision making and action. Further, there is an emerging indication that this approach is…	Journal of Fashion Marketing and Management: An International Journal
Second-hand clothing consumption: A generational cohort analysis of the Chinese market	China	QN	Liang and Xu 2017	/			/		/					The younger generations perceived higher values and held higher purchase intentions than their older counterparts. Different motivations were also identified among the four cohorts (Post-60s, Post-70s, Post-80s and Post-90s) in their second-hand clothing consumption.	International journal of consumer studies
Perceptions, attitudes, and behaviors toward sustainable fashion: Application of Q and Q-R methodologies	South korea	MM	Song et al 2017			/				/	/			Results showed that sustainable fashion consumers in South Korea are most often opinion leaders who are interested in both fashion shopping and sustainability.	International journal of consumer studies
Staging luxury experiences for understanding sustainable fashion consumption: A balance theory application	South korea	QL	Han et al. (2017)	/			/					/	/	This study demonstrates that fashion consumers' limited awareness and knowledge about sustainable fashion products may promote negative sentiments toward SFPC. However, the findings demonstrate that fashion marketers can overcome negative sentiments by staging personalized experiences. Specifically, the staged experiences enable fashion consumers to acquire practical knowledge about sustainable f…	Journal of Business Research
Why do consumers choose sustainable fashion? A cross-cultural study of South Korean, Chinese, and Japanese consumers	South korea, China, Japan	QN	Kong & Eunju Ko 2017	/					/	/			/	Consumers of sustainable products indeed have strong environmental concerns, product knowledge, and positive perceived benefits. However, some hesitate to purchase SFP because they are skeptical about its quality and esthetic value. Those who are loyal to sustainable products tend to focus on health, eco-friendliness, and economic benefits. If they see that sustainable purchasing behavior threate…	Journal of Global Fashion Marketing
Antecedents to organic cotton clothing purchase behaviour: study on Indian youth	India	QN	Varshneya , (2017)				/		/		/			green apparel knowledge and peer influence had no impact on organic clothing purchase behaviour. Youths purchasing organic clothing should be differentiated from other groups so that they can be used as opinion leaders to promote environmentally friendly attitudes. Organic clothing can be positioned as a premium product line that focuses on environmentally friendly attributes.	Journal of Fashion Marketing and Management: An International Journal
Understanding fashion consumers' attitude and behavioral intention toward sustainable fashion products: Focus on sustainable knowledge sources and knowledge types	South Korea	QN	Kong et al (2016)			/	/			/			/	sustainability knowledge types and attitudes toward sustainable fashion products results shows that effectiveness and social knowledge have positive effects on attitudes toward sustainable fashion products.	Journal of Global Fashion Marketing
The impact of moral philosophy and moral intensity on purchase behavior toward sustainable textile and apparel products	South korea	QN	Hong and Kang (2019)				/		/		/			this study revealed that only idealism, of the two dimensions of moral philosophy, had a significant impact on the level of moral intensity toward both organic and naturally dyed textile and apparel product purchase in relation to environmental sustainability, and the level of moral intensity positively influenced consumer purchase behavior toward organic and naturally dyed textile and apparel pr…	Fashion and Textiles
Spillover from past recycling to green apparel shopping behavior: the role of environmental concern and anticipated guilt	South korea	QN	Ha and Kwon (2016)						/		/			the results showed that consumer behavior associated with recycling does spill over into green apparel/fashion product purchase behaviors through one’s motivational belief toward the environment, environmental concern.	Fashion and Textiles
The interactions of CSR, self-congruity and purchase intention among Chinese consumers	China	QN	Lee and Lee (2015)		/					/				We confirmed that fashion companies’ ethical responsibility and philanthropic responsibility could be more influential when it was self-congruous. We found that ethical responsibility is a relatively weak dimension in influencing purchase intention compared with other CSR dimensions.	Australasian Marketing Journal
Predictors of purchase intention toward green apparel products: A cross-cultural investigation in the USA and China.	USA/CHINA	QN	Seung Bong Ko Byoungho Jin , (2017)			/	/	/		/			/	These findings are quite surprising because subjective norm influence purchase intention the most in both countries (USA/CHINA)	Journal of Fashion Marketing and Management: An International Journal
Impact of social influence and green consumption values on purchase intention of organic clothing: a study on collectivist developing economy	India	QN	Varshneya et al. (2017)	/		/	/			/				social influence and attitudes does not impact purchase intention as well as attitude towards organic clothing.	Global Business Review
Determinants of Organic Cotton Apparel Purchase: A Comparison of Young Consumers in the U.S.A. and South Korea	USA/SOUTH KOREA	QN	Han (2018)				/	/		/				attitude was the strongest predictor of American consumers’ purchase intentions, it had an insignificant effect on Korean consumers’ purchase intentions.	Sustainability
Understanding environmentally friendly apparel consumption: an empirical study of Chinese consumers	China	QN	Chi and Zheng (2016)			/	/	/		/			/	Chinese consumers attempt to conform to group norms and therefore tend to consume the products that other members of the group recommend.	International Journal of Sustainable Society
Sustainability and philanthropic awareness in clothing disposal behavior among young Malaysian consumers	Malaysia	QN	Yee et al. (2016)			/					/		/	charity factors have a strong positive relationship to attitude toward clothing disposal and clothing disposal behavior; whereas, the environmental economic factor directly influences the attitude toward clothing disposal but does not directly affect the clothing disposal behavior.	SAGE Open
Understanding Chinese Consumers’ Intention to Purchase Sustainable Fashion Products: The Moderating Role of Face-Saving Orientation	China	QN	Wei and Jung (2017)				/				/			Chinese consumers tend to believe it is the government that is responsible for environmental issues , so green value might be regarded as less relevant to Chinese consumers. With the importance of product value, we also found that Chinese consumers’ behavioral intention towards purchasing sustainable fashion products was closely related to face-saving values.	Sustainability

## Sheet: Result
	Eco-Apparel	Sustainable Apparel	Recycled/ Upcycled Apparel	Ethical/ Slow Apparel	Collaboration Apparel
	7	7	0	2	2
	South Africa;South Korea; China; India;USA;	South korea,South Africa, China, Japan		South Africa; China	M'sia; China
